# Supplementary material for: Zebrafish prdm12b acts independently of nkx6.1 repression to promote eng1b expression in the neural tube p1 domain
Source: PubMed Central journal article supplement (PMC6391800; doi:10.1186/s13064-019-0129-x), 2019-02-27
Supplement: 13064_2019_129_MOESM3_ESM.pdf [file 13064_2019_129_MOESM3_ESM.pdf]

## A

prdm12b

|       |                                                               |     |
|-------|---------------------------------------------------------------|-----|
| WT    | MGSVLPADALVLKAGFKQQLSLALSDIITSDILHSFLYGRWRNVLGEHLFEKATATVSPKT | 60  |
| um318 | MGSVLPADALVLKAGFKQQLSLALSDIITSDILHSFLYGRWRPQ---NLSQPQNCLHRRG  | 57  |
| um319 | MGSVLPADALVLKAGFKQQLSLALSDIITSDILHSFLYGRWRNVRGEDRHCQPQNCLHRRG | 60  |
| WT    | AFTAEVLAQSFSGVEVQLSSLVLPSEVIIAQSSIPGEGLGIFSKTWIKAGTEMGPFTGRV  | 120 |
| um318 | PGAVILWRGPETFQLSSAK-----                                      | 76  |
| um319 | PGAVILWRGPETFQLSSAK-----                                      | 79  |
| WT    | ISPEHVDLFKNNNLMEVFNEDGTVRYFIDASQEDHRSWMTYIKCARNEQEONLEVQIG    | 180 |
| um318 | -----                                                         | 76  |
| um319 | -----                                                         | 79  |
| WT    | SSIFYKAVETIPDPQELLVWYGNSHNTFLGIPGVPGTEEEQQKTKTDEFHLCDTVTAAA   | 240 |
| um318 | -----                                                         | 76  |
| um319 | -----                                                         | 79  |
| WT    | LSTASRMRCVICHRGFNSRNLRSRSHMRIHTLTKPFVCRFCNRRFSQSSTLRNHVRLHTGE | 300 |
| um318 | -----                                                         | 76  |
| um319 | -----                                                         | 79  |
| WT    | RPYKCHVCQSAYSQLAGLRAHQKSARHRPANTGAVVGLQAHSPPPPQLAQVHPASLVHH   | 360 |
| um318 | -----                                                         | 76  |
| um319 | -----                                                         | 79  |
| WT    | IPTMVL                                                        | 366 |
| um318 | -----                                                         | 76  |
| um319 | -----                                                         | 79  |

## B

bhlhe22

|       |                                                                |     |
|-------|----------------------------------------------------------------|-----|
| WT    | MDRRINLGGDIFHKTL SAVSSKKMDSFRPTAGIDL SARDSQSPISCFEQNDPDPVQPGGR | 60  |
| um320 | MDRRINLGGDIFHKTL SAVSSKKMDSFRPTAGIDL SARDSQSPISCFEQNDPDPVQPGGR | 60  |
| WT    | AGTLGLPTGSLCKVYGESANRTS GAESSGGEQSPDDSDERCEMMLMTDGRRTTVP GAKSE | 120 |
| um320 | AGTLGLPIFVCEIRRERQDFRRGEQRRRAK PGR-----                        | 94  |
| WT    | GGKKNKEQKMLRLNINARERRRMDLNDALDELRAVIPYAHSPSVRKL SKIATLL LAKNY  | 180 |
| um320 | -----                                                          | 94  |
| WT    | ILMQAQALEEMRRLVAYLNQGQAISAASLPATTALTPGLSAYEQPAGYPPFAGVAASSCP   | 240 |
| um320 | -----                                                          | 94  |
| WT    | DKCALFNNVTSSLCKQCTDKP                                          | 261 |
| um320 | -----                                                          | 94  |

## C

nkx6.1

|       |                                                               |     |
|-------|---------------------------------------------------------------|-----|
| WT    | MLAVGQMDGSRQSAFLLNTPLAALHSMTEMKTPLYPAYPLSSTGPASSTSP TATSPNPG  | 60  |
| um321 | MLAVGQMDGSRQSAFLLNTPLAALHSMTEMKTPLYPAYPLSS-----TDSYLSER       | 52  |
| um322 | MLAVGQMDGSRQSAFLLNTPLAALHSMTEMKTPLYPAYPLSSTASSILHFTDSYLSER    | 60  |
| WT    | GIPVSSPGIKTSSGLSALASAQQCAIATPHGINDILSRPSVACSPAGILSGLPRFSSLS P | 120 |
| um321 | WDPGLVPGDQNLQWTFSSRISP AVRDRHTSRNKRHPQPTLGGFLSRRNLVWTAPFQQPES | 112 |
| um322 | WDPGLVPGDQNLQWTFSSRISP AVRDRHTSRNKRHPQPTLGGFLSRRNLVWTAPFQQPES | 120 |
| WT    | PPPPGLYFSPSAAAVAVARYPKPLTELPGRTPIFWPGVMQSPHWRDARFACSPHQNSVLL  | 180 |
| um321 | PTASRALFQP-----                                               | 122 |
| um322 | PTASRALFQP-----                                               | 130 |
| WT    | DKDGKRKHTRPTFSGQQIFALEKTFEQTKYLAGPERARLAYS LGMTESQVKVWFQNRRTK | 240 |
| um321 | -----                                                         | 122 |
| um322 | -----                                                         | 130 |
| WT    | WRKRHAEMASAKKKQDSETERLKGASENEDDDDDYKPLDPNSDDEKITQLLKKHKPNT    | 300 |
| um321 | -----                                                         | 122 |
| um322 | -----                                                         | 130 |
| WT    | ALIIHTSENESS                                                  | 312 |
| um321 | -----                                                         | 122 |
| um322 | -----                                                         | 130 |
