# Supplementary material for: Zebrafish prdm12b acts independently of nkx6.1 repression to promote eng1b expression in the neural tube p1 domain
Source: PubMed Central journal article supplement (PMC6391800; doi:10.1186/s13064-019-0129-x), 2019-02-27

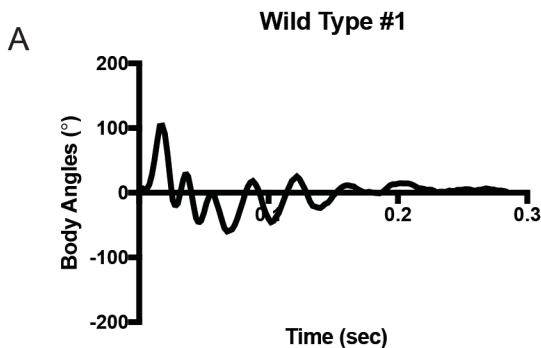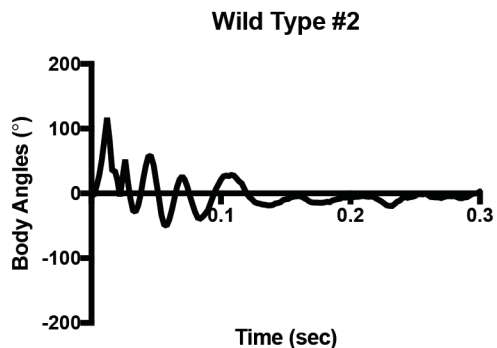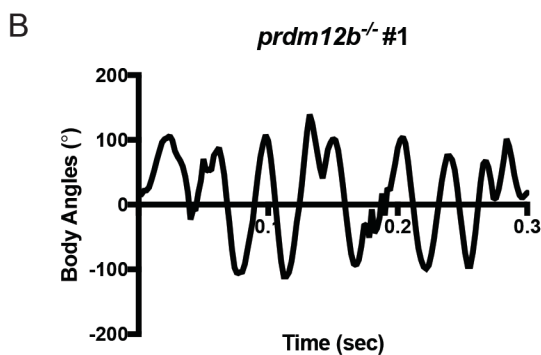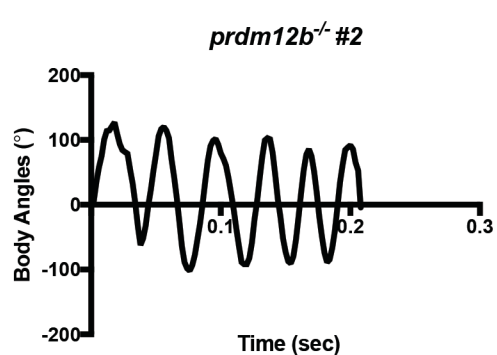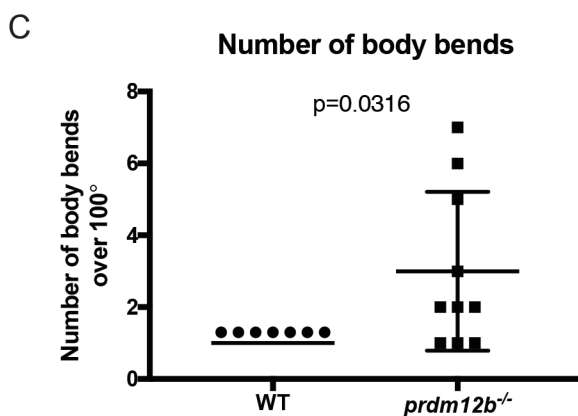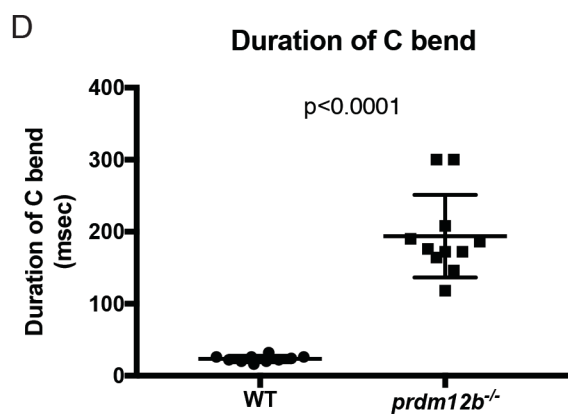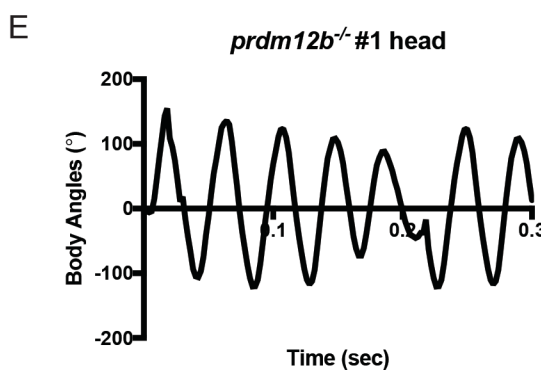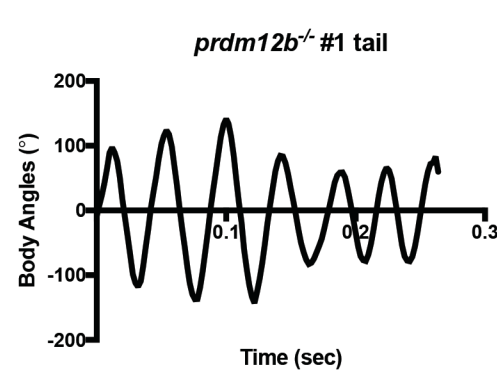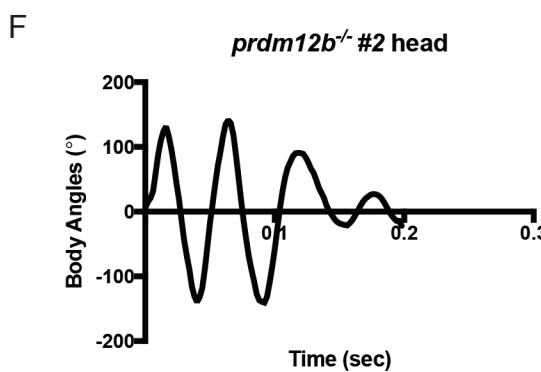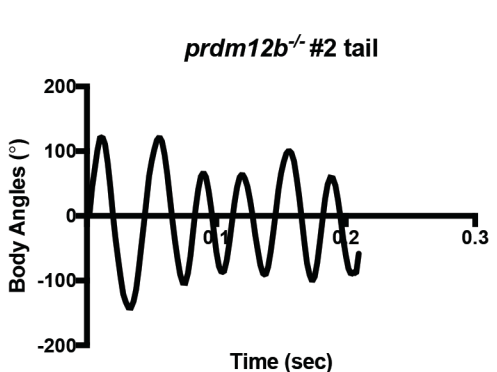

Supplement: 13064_2019_129_MOESM5_ESM.pdf [file 13064_2019_129_MOESM5_ESM.pdf]
